# Supplementary material for: Gene regulation and speciation in a migratory divide between songbirds
Source: Springer Nature journal article supplement (doi:10.1038/s41467-023-44352-2), 2024-01-02
Supplement: MOESM1 [file 41467_2023_44352_MOESM1_ESM.pdf]

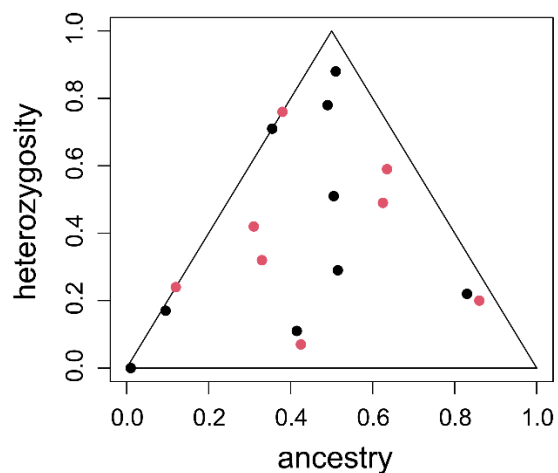

**Figure S1. Hybrids included in study.** Relationship between their ancestry (0=inland, 1=coastal) and interspecific heterozygosity. Birds sampled during the migratory state shown in pink.

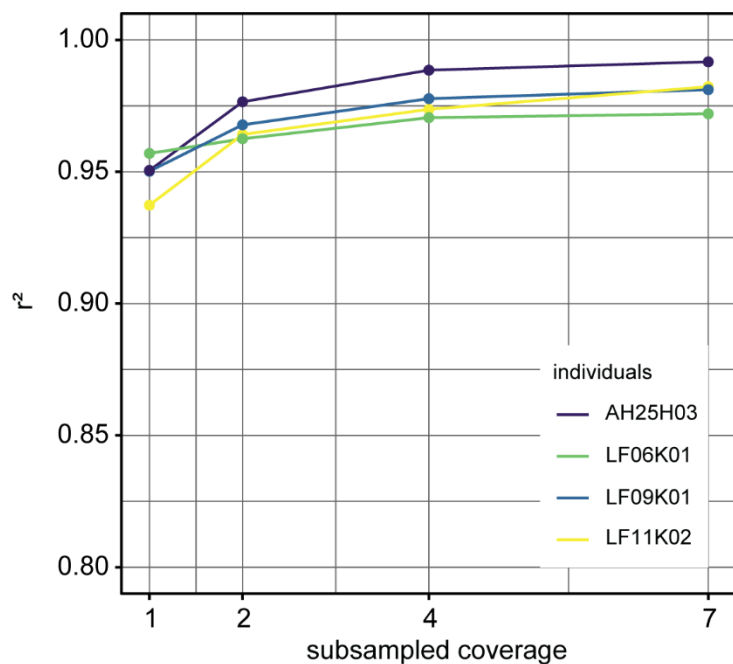

**Figure S2. Imputation accuracy from STITCH.** Squared correlation coefficients between imputed and actual genotypes for four hybrids sequenced to high coverage are shown.
